# Supplementary material
Source: PubMed Central journal article supplement (PMC3743279)
Supplement: jn.113.174599_nutrition174599SupplementaryData1.pdf [file jn.113.174599_nutrition174599SupplementaryData1.pdf]

## Online Supporting Material

### SUPPLEMENTAL TABLE 1. The Differential Equations

$$\frac{d[\text{trp}]}{dt} = \frac{1}{9} V_{\text{trpsl}}(\text{portrp}) - V_{\text{TDO}}(\text{trp}) - V_{\text{PRO}}(\text{trp}) + k_3 \cdot \text{lpool} - k_1 \cdot \text{trp} \quad [1]$$

$$\frac{d[\text{nfk}]}{dt} = V_{\text{TDO}}(\text{trp}) - V_{\text{AFD}}(\text{nfk}, \text{kyn}) \quad [2]$$

$$\frac{d[\text{kyn}]}{dt} = V_{\text{AFD}}(\text{nfk}, \text{kyn}) - V_{\text{KYN1}}(\text{kyn}, \text{plp}) - V_{\text{KAT1}}(\text{kyn}, \text{plp}) - V_{\text{KMO}}(\text{kyn}) - d_3 \cdot \text{kyn} \quad [3]$$

$$\frac{d[\text{ka}]}{dt} = V_{\text{KAT1}}(\text{kyn}, \text{plp}) - d_4 \cdot \text{ka} \quad [4]$$

$$\frac{d[\text{aa}]}{dt} = V_{\text{KYN1}}(\text{kyn}, \text{plp}) - d_5 \cdot \text{aa} \quad [5]$$

$$\frac{d[\text{hk}]}{dt} = V_{\text{KMO}}(\text{kyn}) - V_{\text{KAT2}}(\text{hk}, \text{plp}) - V_{\text{KYN2}}(\text{hk}, \text{kyn}, \text{plp}) - d_6 \cdot \text{hk} \quad [6]$$

$$\frac{d[\text{xa}]}{dt} = V_{\text{KAT2}}(\text{hk}, \text{plp}) - d_7 \cdot \text{xa} \quad [7]$$

$$\frac{d[\text{haa}]}{dt} = V_{\text{KYN2}}(\text{hk}, \text{kyn}, \text{plp}) - V_{\text{HAO}}(\text{haa}) - d_8 \cdot \text{haa} \quad [8]$$

$$\frac{d[\text{qa}]}{dt} = V_{\text{HAO}}(\text{haa}) - d_9 \cdot \text{qa} \quad [9]$$

$$\frac{d[\text{portrp}]}{dt} = -V_{\text{trpsl}}(\text{portrp}) + 9V_{\text{trpgs}}(\text{gtrp}) + 3m \cdot (\text{pertrp} - \text{portrp}) + 9k_1 \cdot \text{trp} \quad [10]$$

$$\frac{d[\text{lpool}]}{dt} = V_{\text{PRO}}(\text{trp}) - k_3 \cdot \text{lpool} \quad [11]$$

$$\frac{d[\text{mtrp}]}{dt} = (8/90)V_{\text{trp}}(\text{pertrp}) - k_4 \cdot \text{mtrp} - V_{\text{PRO}}(\text{mtrp}) + k_3 \cdot \text{mpool} \quad [12]$$

$$\frac{d[\text{mpool}]}{dt} = V_{\text{PRO}}(\text{mtrp}) - k_3 \cdot \text{mpool} \quad [13]$$

$$\frac{d[\text{pertrp}]}{dt} = \frac{90}{8}k_4 \cdot \text{mtrp} + \frac{3}{8}m \cdot (\text{portrp} - \text{pertrp}) - V_{\text{trpsm}}(\text{pertrp}) - k_2 \cdot \text{trp} \quad [14]$$

$$\frac{d[\text{gtrp}]}{dt} = -V_{\text{trpgs}}(\text{gtrp}) + \text{gutin}(t) \quad [15]$$

## Online Supporting Material

**SUPPLEMENTAL TABLE 2.** 24-h urinary metabolite excretion in adequate and deficient vitamin B-6 status at basal and after tryptophan load. Data after simulation of trp load are presented as area-under-the curve (AUC).

|                          | Urinary metabolite excretion |           |          |           |
|--------------------------|------------------------------|-----------|----------|-----------|
|                          | Basal                        |           | Trp load |           |
|                          | Adequate                     | Deficient | Adequate | Deficient |
|                          | <i>μmol/24h</i>              |           |          |           |
| <b>Kyn</b>               | 2.9                          | 3.2       | 72       | 92        |
| <b>KA</b>                | 5.0                          | 3.6       | 123      | 92        |
| <b>AA</b>                | 4.9                          | 3.4       | 100      | 69        |
| <b>HK</b>                | 2.0                          | 3.4       | 50       | 86        |
| <b>XA</b>                | 2.0                          | 2.2       | 49       | 55        |
| <b>HaA</b>               | 4.6                          | 4.8       | 95       | 97        |
| <b>QA</b>                | 23.0                         | 23.7      | 468      | 474       |
| <b>Total<sup>1</sup></b> | 44.3                         | 44.3      | 957      | 964       |

<sup>1</sup> Total excretion of tryptophan catabolites (*μmol/24h*) is indicative of the predicted flux of whole body tryptophan catabolism.
